# Supplementary material for: Impaired Chromatin Remodelling at STAT1-Regulated Promoters Leads to Global Unresponsiveness of Toxoplasma gondii-Infected Macrophages to IFN-γ
Source: PLoS Pathog. 2012 Jan 19;8(1):e1002483. doi: 10.1371/journal.ppat.1002483 (PMC3262016; doi:10.1371/journal.ppat.1002483)
Supplement: Table S3 — IFN-γ-regulated biological processes which are predominantly counteracted by T. gondii. Genes that were differentially expressed after treatment of non-infected BMM with IFN-γ (at least four-fold; identified by ANOVA), but not in those previously infected with T. gondii were subjected to the functional annotation of biological processes using the DAVID Bioinformatics resource. Major functional targets of parasite interference were identified by including those GO annotation terms that were common to at least five genes, and that were significantly enriched (modified Fisher's exact test, P<0.1). The level of enrichment of genes was determined against all Mus musculus genes. (XLSX) [file ppat.1002483.s007.xlsx]

## Sheet: Tabelle1
Table S3: IFN-g-regulated biological processes which are predominantly counteracted by T. gondii
A: Processes based on IFN-g-induced mRNAs of non-infected BMMΦ
Gene ontology term	Genes [No.]	P value	Enrichment [x-fold]
immune response	27	8e-10	4.3
adaptive immune response	11	1.7e-07	9.7
adaptive immune response based on somatic recombination of immune receptors built from immunoglobulin superfamily domains	11	1.7e-07	9.7
positive regulation of immune system process	15	7e-07	5.4
lymphocyte mediated immunity	10	7.5e-07	9.8
innate immune response	11	1.7e-06	7.6
antigen processing and presentation	10	2.4e-06	8.5
defense response	21	2.4e-06	3.5
leukocyte mediated immunity	10	2.9e-06	8.3
positive regulation of response to stimulus	13	7.6e-06	5.2
antigen processing and presentation of exogenous antigen	6	3.1e-05	15.9
immune effector process	10	4.9e-05	5.9
inflammatory response	13	5.1e-05	4.3
immunoglobulin mediated immune response	7	0.00019	8.3
B cell mediated immunity	7	0.00023	8
response to wounding	15	0.00024	3.2
positive regulation of immune response	9	0.00049	4.9
regulation of T cell activation	8	0.00062	5.5
complement activation, classical pathway	5	0.00065	12.4
regulation of lymphocyte activation	9	0.00071	4.6
humoral immune response	6	0.00076	8.3
activation of immune response	7	0.001	6
regulation of leukocyte activation	9	0.0011	4.3
humoral immune response mediated by circulating immunoglobulin	5	0.0012	10.6
regulation of cell activation	9	0.0012	4.3
activation of plasma proteins involved in acute inflammatory response	5	0.0013	10.3
complement activation	5	0.0013	10.3
positive regulation of lymphocyte activation	7	0.0016	5.5
positive regulation of T cell activation	6	0.0019	6.8
positive regulation of leukocyte activation	7	0.0021	5.3
positive regulation of cell activation	7	0.0024	5.1
regulation of T cell differentiation	5	0.0038	7.7
protein processing	6	0.0072	5
regulation of lymphocyte differentiation	5	0.0075	6.4
positive regulation of cell differentiation	8	0.0093	3.4
protein maturation	6	0.0094	4.6
protein maturation by peptide bond cleavage	5	0.011	5.7
lymphocyte activation	8	0.014	3.1
T cell activation	6	0.02	3.8
hemopoiesis	9	0.02	2.7
acute inflammatory response	5	0.023	4.6
regulation of protein amino acid phosphorylation	6	0.023	3.7
regulation of leukocyte proliferation	5	0.024	4.5
positive regulation of developmental process	8	0.025	2.8
leukocyte activation	8	0.028	2.7
positive regulation of signal transduction	7	0.028	3
lipid catabolic process	6	0.034	3.3
regulation of apoptosis	14	0.035	1.9
hemopoietic or lymphoid organ development	9	0.036	2.4
regulation of programmed cell death	14	0.038	1.9
regulation of cell death	14	0.04	1.8
membrane invagination	7	0.041	2.8
endocytosis	7	0.041	2.8
positive regulation of cell communication	7	0.042	2.8
embryonic organ development	8	0.044	2.5
immune system development	9	0.045	2.3
positive regulation of macromolecule metabolic process	15	0.045	1.8
cell activation	8	0.048	2.4
regulation of response to external stimulus	5	0.05	3.6
embryonic organ morphogenesis	6	0.066	2.8
regulation of protein modification process	6	0.071	2.7
membrane organization	8	0.074	2.2
proteolysis	20	0.099	1.4
B: Processes based on IFN-g-repressed mRNAs of non-infected BMMΦ
Gene ontology term	Genes [No.]	P value	Enrichment [x-fold]
response to hormone stimulus	12	0.00011	4.3
response to endogenous stimulus	12	0.00028	3.9
negative regulation of signal transduction	11	0.00062	3.8
negative regulation of cell communication	11	0.0012	3.5
cell adhesion	21	0.0013	2.2
biological adhesion	21	0.0013	2.2
growth	11	0.0016	3.4
negative regulation of kinase activity	6	0.0016	7
negative regulation of protein kinase activity	6	0.0016	7
regulation of ossification	6	0.0019	6.7
negative regulation of transferase activity	6	0.0019	6.7
ossification	8	0.002	4.5
response to wounding	15	0.0022	2.6
immune response	18	0.0025	2.3
response to steroid hormone stimulus	6	0.0033	5.9
bone development	8	0.0037	4
regulation of protein kinase activity	10	0.0042	3.2
small GTPase mediated signal transduction	12	0.0043	2.8
inflammatory response	11	0.0048	2.9
response to organic substance	18	0.0051	2.1
regulation of kinase activity	10	0.0052	3.1
lipid localization	8	0.0058	3.7
intracellular signaling cascade	27	0.0058	1.8
regulation of transferase activity	10	0.0065	3
macromolecular complex subunit organization	14	0.0092	2.3
chemotaxis	7	0.01	3.8
taxis	7	0.01	3.8
circulatory system process	7	0.011	3.7
blood circulation	7	0.011	3.7
macromolecular complex assembly	13	0.012	2.3
membrane invagination	9	0.014	2.8
endocytosis	9	0.014	2.8
lipid transport	7	0.015	3.5
cell cycle arrest	5	0.015	5.2
transmembrane receptor protein tyrosine kinase signaling pathway	9	0.016	2.8
enzyme linked receptor protein signaling pathway	11	0.017	2.4
response to inorganic substance	6	0.019	3.9
response to peptide hormone stimulus	6	0.022	3.7
skeletal system development	11	0.022	2.3
cellular macromolecular complex subunit organization	10	0.023	2.4
myeloid cell differentiation	6	0.023	3.7
regulation of blood pressure	5	0.024	4.6
negative regulation of molecular function	7	0.024	3.1
regulation of phosphorylation	11	0.025	2.3
hemopoiesis	10	0.026	2.4
negative regulation of catalytic activity	6	0.028	3.5
muscle organ development	8	0.029	2.7
cellular macromolecular complex assembly	9	0.03	2.5
regulation of phosphorus metabolic process	11	0.031	2.2
regulation of phosphate metabolic process	11	0.031	2.2
regulation of cell motion	6	0.034	3.3
tube development	10	0.035	2.2
homeostatic process	17	0.036	1.7
protein complex biogenesis	9	0.038	2.4
protein complex assembly	9	0.038	2.4
integrin-mediated signaling pathway	5	0.039	3.9
lung development	6	0.039	3.2
defense response	14	0.04	1.9
membrane organization	10	0.04	2.2
homeostasis of number of cells	6	0.042	3.2
respiratory tube development	6	0.042	3.2
cartilage development	5	0.042	3.8
chemical homeostasis	12	0.044	2
hemopoietic or lymphoid organ development	10	0.048	2.1
gland morphogenesis	5	0.053	3.5
respiratory system development	6	0.058	2.9
vasculature development	9	0.06	2.1
response to drug	5	0.061	3.4
immune system development	10	0.061	2
striated muscle cell differentiation	5	0.063	3.3
cell morphogenesis involved in differentiation	8	0.067	2.2
regulation of cell migration	5	0.069	3.2
regulation of cell proliferation	15	0.069	1.7
cellular component morphogenesis	11	0.072	1.9
positive regulation of catalytic activity	9	0.073	2
response to extracellular stimulus	6	0.073	2.7
sulfur metabolic process	5	0.073	3.2
regulation of cell adhesion	5	0.073	3.2
cell morphogenesis	10	0.075	1.9
actin filament-based process	7	0.077	2.4
carboxylic acid transport	5	0.085	3
organic acid transport	5	0.088	3
developmental growth	5	0.088	3
cation homeostasis	7	0.09	2.3
cell motion	11	0.091	1.8
cytoskeleton organization	10	0.098	1.8
di-, tri-valent inorganic cation homeostasis	6	0.099	2.4
